# Supplementary material for: Kruppel Like Factor 12 gene regulates ovarian granulosa cells proliferation and apoptosis via the PI3K/Akt signaling pathway
Source: Research Square preprint supplement (doi:10.21203/rs.3.rs-7203220/v1), 2025-09-09
Supplement: Supplementary file 1 [file 204dbb8f077798e71159ecf8.xlsx]

## Sheet: Sheet1
Table 1. Sequences of siRNA used in the study.
Group	Sequences
siRNA-1	F: 5ʹ-GCCAAAUGUGACCUUAGAUTT-3ʹ
	R:5ʹ-AUCUAAGGUCACAUUUGGCTT-3ʹ
siRNA-2	F: 5ʹ-GCUAAUGCUUGAUGGGAUGTT-3ʹ
	R:5ʹ-CAUCCCAUCAAGCAUUAGCTT-3ʹ
siRNA-3	F: 5ʹ-GGCCUAUCUCCCAGACAAATT-3ʹ
	R:5ʹ-UUUGUCUGGGAGAUAGGCCTT-3ʹ
siRNA-4	F: 5ʹ-GCCUUCAAGUCCGAUGAAUTT-3ʹ
	R:5ʹ-AUUCAUCGGACUUGAAGGCTT-3ʹ
siRNA-NC	F: 5ʹ-UUCUCCGAACGUGUCACGUTT-3ʹ
	R:5ʹ-ACGUGACACGUUCGGAGAATT-3ʹ
