# Supplementary material for: Kruppel Like Factor 12 gene regulates ovarian granulosa cells proliferation and apoptosis via the PI3K/Akt signaling pathway
Source: Research Square preprint supplement (doi:10.21203/rs.3.rs-7203220/v1), 2025-09-09
Supplement: Supplementary file 2 [file 40f3971330f70af750822023.xlsx]

## Sheet: Sheet1
Table 2. Primer sequences used in qRT-PCR.
Gene	Genebank accession No.	Primers
GAPDH	NM_001082253.1	F: 5ʹ-GTTTGTGATGGGCGTGAACC-3ʹ
		R:5ʹ-GTGGAGGCAGGGATGATGTT-3ʹ
KLF12	XM_051850621.1	F: 5ʹ-AAAACGGCGTATCCACAGGT-3ʹ
		R:5ʹ-GCCTCGTCAGTTCGTCTGAA-3ʹ
Bax	XM_008252361.3	F: 5ʹ-CGCGAGGTCTTTTTCCGAGT-3ʹ
		R:5ʹ-CAACCACCCTGGTCTTGGAT-3ʹ
BCL-2	XM_008261439.3	F: 5ʹ-ACTGAGTACCTGAACCGGCA-3ʹ
		R:5ʹ-TGATGCAAGCTCCTATCAGGG-3ʹ
Caspase-9	XM_008249762.3	F: 5ʹ-GAGGGGACAGGACCTCTGG-3ʹ
		R:5ʹ-GGAGACGAAACCTGGGAAGG-3ʹ
Caspase-3	XM_051828488.1	F: 5ʹ-TGGGACAAGATTTCCATAAGACC-3ʹ
		R:5ʹ-TGTACCAGACCGGGATGACA-3ʹ
P53	XM_008270660.3	F: 5ʹ-GAAGCCGCTGGATGGAGAAT-3ʹ
		R:5ʹ-AGGCCCCTCTCTCTTGAACA-3ʹ
PCNA	XM_017341762.2	F: 5ʹ-GGACACCTTGGCGCTAGTAT-3ʹ
		R:5ʹ-TTTCCCAGTTCTCCACTGGC-3ʹ
CCNA2	NM_001257364.1	F: 5ʹ-GCACTCTACACAGTCACGGG-3ʹ
		R:5ʹ-GTGTCTCTGGTGGGTTGAGG-3ʹ
CCNB1	XM_051853432.1	F: 5ʹ-AGTGAGTGATGTGGACGCAG-3ʹ
		R:5ʹ-CCAGTCGATTAGGATGGCCC-3ʹ
CCND1	XM_002712830.4	F: 5ʹ-CTGTCTCTGATCCGCAAGCA-3ʹ
		R:5ʹ-GAGCGAGCTCACTTCTTCGT-3ʹ
CCNE2	XM_051844626.1	F: 5ʹ-GCCTCAGGTTTGGAATGGGA-3ʹ
		R:5ʹ-ACTGCACACTGGTGACAACT-3ʹ
CDK1	XM_002718473.4	F: 5ʹ-CTGGGGTCAGCTCGTTACTC-3ʹ
		R:5ʹ-GAGATGCCAAGCTTCCTGGT-3ʹ
CDK4	XM_002720924.4	F: 5ʹ-CAGCTACCAGATGGCGCTTA-3ʹ
		R:5ʹ-GGCTTCGGAGTTTCCACAGA-3ʹ
CYP11A1	XM_008253734.3	F: 5ʹ-CTCCTCAAGGCCAGCATCAA-3ʹ
		R:5ʹ-CATCGGGTGGGGTCAAACTT-3ʹ
CYP19A1	XM_051821734.1	F: 5ʹ-CCCCTCATTTCCTACGCCAG-3ʹ
		R:5ʹ-ATCGGGAGACGTAATGGCTG-3ʹ
StAR	XM_017350352.2	F: 5ʹ-TGGGAGCTCCTACAGACACA-3ʹ
		R:5ʹ-GAGTCTCCTCCAGCCGAGAA-3ʹ
