# Supplementary material for: Kruppel Like Factor 12 gene regulates ovarian granulosa cells proliferation and apoptosis via the PI3K/Akt signaling pathway
Source: Research Square preprint supplement (doi:10.21203/rs.3.rs-7203220/v1), 2025-09-09
Supplement: Supplementary file 3 [file e852de7b3f536e584ec0fdb4.xlsx]

## Sheet: Sheet1
Table 3. The antibodies for Protein Simple Wes Western Blotting System.
Antibodies names	Source	Dilution Ratio	Vendor	Catalog Number
GAPDH	Mouse	1:2000	Proteintech, China	60004-1-Ig
KLF12	Rabbit	1:200	Proteintech, China	13156-1-AP
Bax	Mouse	1:500	Proteintech, China	50599-2-Ig
BCL-2	Rabbit	1:500	Proteintech, China	26593-1-AP
Caspase-9	Rabbit	1:500	Proteintech, China	10380-1-AP
Caspase-3	Rabbit	1:200	Proteintech, China	25128-1-AP
p53	Mouse	1:500	Proteintech, China	60283-2-Ig
PCNA	Mouse	1:500	Proteintech, China	60097-1-Ig
CCNB1	Rabbit	1:200	Proteintech, China	55004-1-AP
CCNA2	Mouse	1:500	Proteintech, China	18202-1-AP
CDK4	Rabbit	1:500	Proteintech, China	11026-1-AP
PI3K	Rabbit	1:200	Proteintech, China	60225-1-Ig
Akt	Mouse	1:200	Proteintech, China	60203-2-Ig
p-PI3K	Mouse	1:200	Affinity, China	AF3241
p-Akt	Mouse	1:200	Proteintech, China	66444-1-Ig
